# Supplementary material
Source: publisher figshare collection journal article supplement (https://acs.figshare.com/ndownloader/files/4187017)
Supplement: Supplementary file 1 [file 4187017]

## **Supporting Information**

### **Environmental friendly crush-magnetic separation technology for recycling metal-plated plastics from end-of-life vehicles**

Mianqiang Xue, Ji Li, Zhenming Xu\*

*School of Environmental Science and Engineering, Shanghai Jiao Tong University, 800  
Dongchuan Road, Shanghai 200240, People's Republic of China*

Corresponding author phone: +86 21 54747495; Fax: +86 21 54747495; e-mail:  
[zmxu@sjtu.edu.cn](mailto:zmxu@sjtu.edu.cn)

#### **Supporting Information Content**

3 pages (including the cover page)

3 Figures

**FIGURE S1. Liberation characteristics of MPP**

**FIGURE S2. The effect of steps on the separation efficiency**

**FIGURE S3. The average annual value of crushed ABS (2010-12-1 ~ 2011-11-30)**

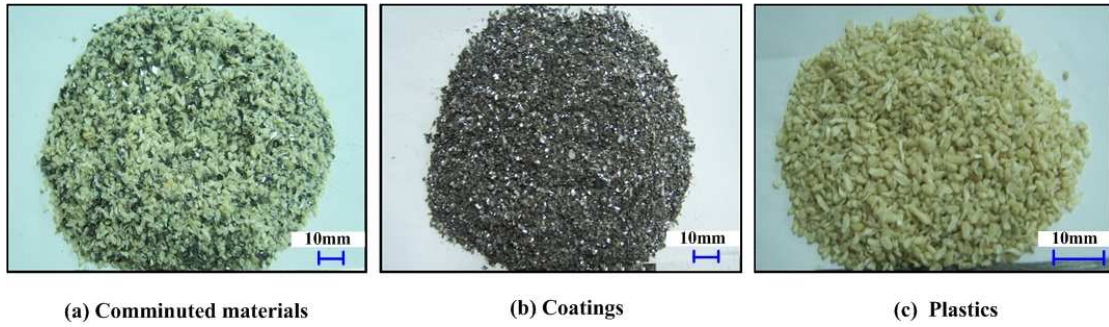

**FIGURE S1. Liberation characteristics of MPP**

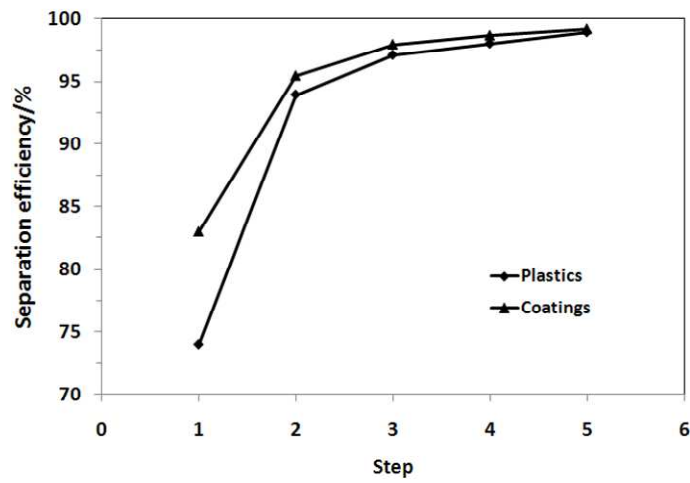

**FIGURE S2. The effect of steps on separation efficiency**

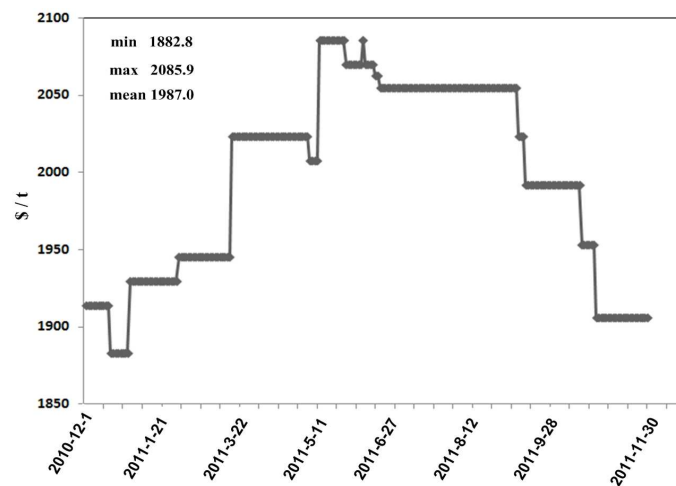

**FIGURE S3. The average annual value of crushed ABS (2010-12-1 ~ 2011-11-30)  
(All the value of each day comes from the website: <http://www.recyclechina.com/>)**

## Profit Calculation

### Nomenclature

|                 |                         |
|-----------------|-------------------------|
| RE              | the revenue             |
| RE <sub>p</sub> | the revenue of plastics |
| RE <sub>c</sub> | the revenue of coatings |
| W               | mass fraction           |
| O               | recycling rate          |
| CO              | cost                    |
| CO <sub>e</sub> | cost of equipments      |
| CO <sub>s</sub> | cost of salary          |
| CO <sub>r</sub> | cost of raw materials   |
| CO <sub>p</sub> | cost of electric power  |
| CO <sub>d</sub> | cost of depreciation    |
| CO <sub>m</sub> | cost of maintenance     |
| WH              | working hours a year    |
| PC              | production capacity     |
| PR              | profit                  |

$$(1) RE_p = 1t \times W_p \times O_p \times \$1987.0/t = 1t \times 0.86 \times 0.79 \times \$1987.0/t = \$1350.0$$

$$RE_c = 1t \times W_c \times O_c \times \$2484.5/t = 1t \times 0.14 \times 0.82 \times \$2484.5/t = \$285.2$$

$$RE = RE_p + RE_c = \$1350.0 + \$285.2 = \$1635.2$$

$$(2) CO_s = \frac{\$1.62/h \times 4}{PC} = \frac{\$1.62/h \times 4}{0.6t/h} = \$10.8/t$$

$$CO_d = \frac{CO_e}{WH \times PC} = \frac{\$38819}{10 \times 250 \times 8h \times 0.6t/h} = 3.2\$/t$$

$$CO = CO_s + CO_r + CO_p + CO_d + CO_m = \$10.8 + \$1187.5 + \$15 + \$3.2 + \$0.8 = \$1217.3$$

$$(3) PR = RE - CO = \$1635.2 - \$1217.3 = \$417.9$$
